# Supplementary material for: Improving wheat grain composition for human health by constructing a QTL atlas for essential minerals
Source: PubMed Central journal article supplement (PMC11327371; doi:10.1038/s42003-024-06692-7), 2024-08-15
Supplement: 42003_2024_6692_MOESM2_ESM.pdf [file 42003_2024_6692_MOESM2_ESM.pdf]

## **Supplementary Materials for:**

### **Improving wheat grain composition for human health by constructing a QTL atlas for essential minerals.**

Petros P. Sigalas<sup>1\*</sup>, Peter R. Shewry<sup>1\*</sup>, Andrew Riche<sup>1</sup>, Luzie Wingen<sup>2</sup>, Cong Feng<sup>3</sup>, Ajay Siluveru<sup>2</sup>, Noam Chayut<sup>2</sup>, Amanda Burrige<sup>4</sup>, Cristobal Uauy<sup>2</sup>, March Castle<sup>1</sup>, Saroj Parmar<sup>1</sup>, Charlie Philp<sup>2</sup>, David Steele<sup>1</sup>, Simon Orford<sup>2</sup>, Michelle Leverington-Waite<sup>2</sup>, Shifeng Cheng<sup>3</sup>, Simon Griffiths<sup>2</sup> and Malcolm J. Hawkesford<sup>1\*\*</sup>

<sup>1</sup>*Rothamsted Research, Harpenden, Hertfordshire, ALF 2JQ, UK*

<sup>2</sup>*John Innes Centre, Norwich, Norfolk, NR4 7UH, UK*

<sup>3</sup>*Shenzhen Branch, Guangdong Laboratory for Lingnan Modern Agriculture, Genome Analysis Laboratory of the Ministry of Agriculture, Agricultural Genomics Institute at Shenzhen, Chinese Academy of Agricultural Sciences, Shenzhen 518124, China*

<sup>4</sup>*School of Biological Sciences, University of Bristol, Bristol, BS8 1UD, UK*

\*These authors contributed equally.

\*\*Corresponding author (email [malcolm.hawkesford@rothamsted.ac.uk](mailto:malcolm.hawkesford@rothamsted.ac.uk)).

### **Supplementary Material List**

Supplementary Fig. 1

Supplementary Fig. 2

Supplementary Table 1

Supplementary Table 2

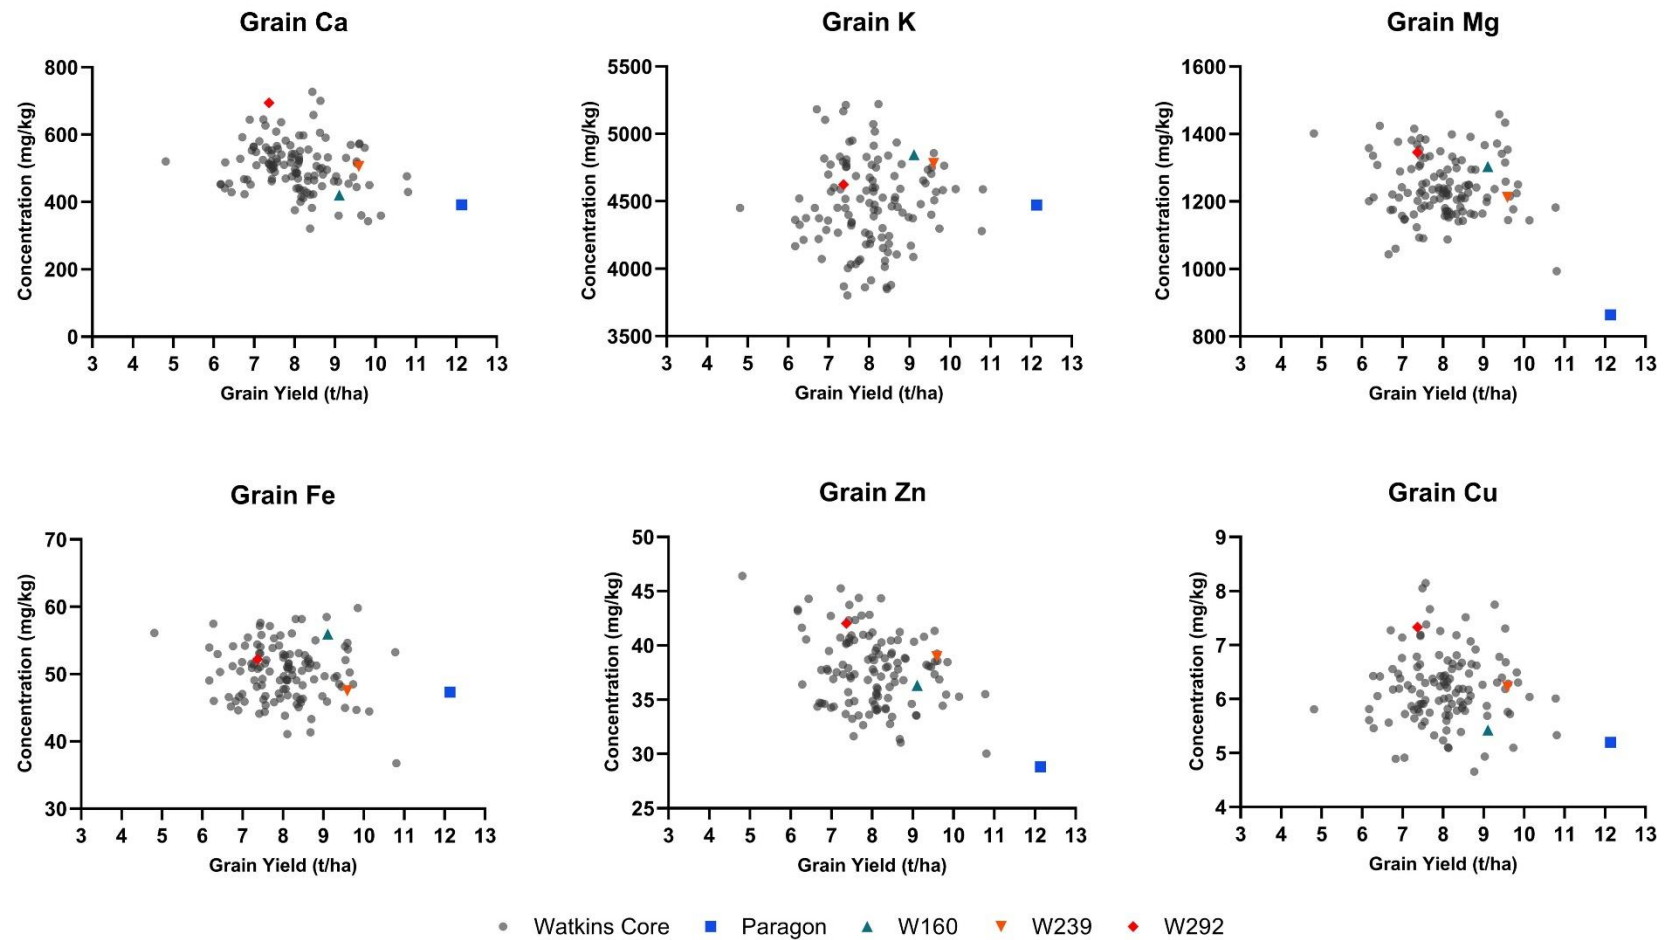

**Supplementary Fig. 1: Relationship between grain mineral concentration and grain yield in A. E. Watkins landraces and cv. Paragon** - This figure illustrates the relationship between the grain mineral concentration (Ca, K, Mg, Fe, Zn, and Cu) and the grain yield of 119 Watkins landraces from the core A.E. Watkins collection and cv. Paragon. These were grown in randomised block design with 3 replicates at Rothamsted Research for four successive years, with the data representing the mean values over the four-year period (2011-2014) ( $n=12$ ). The three selected Watkins landraces, which were used as parents for the development of biparental segregating populations, along with cv. Paragon, are depicted in distinct colours. Plots were created in GraphPad Prism v9.3.1.

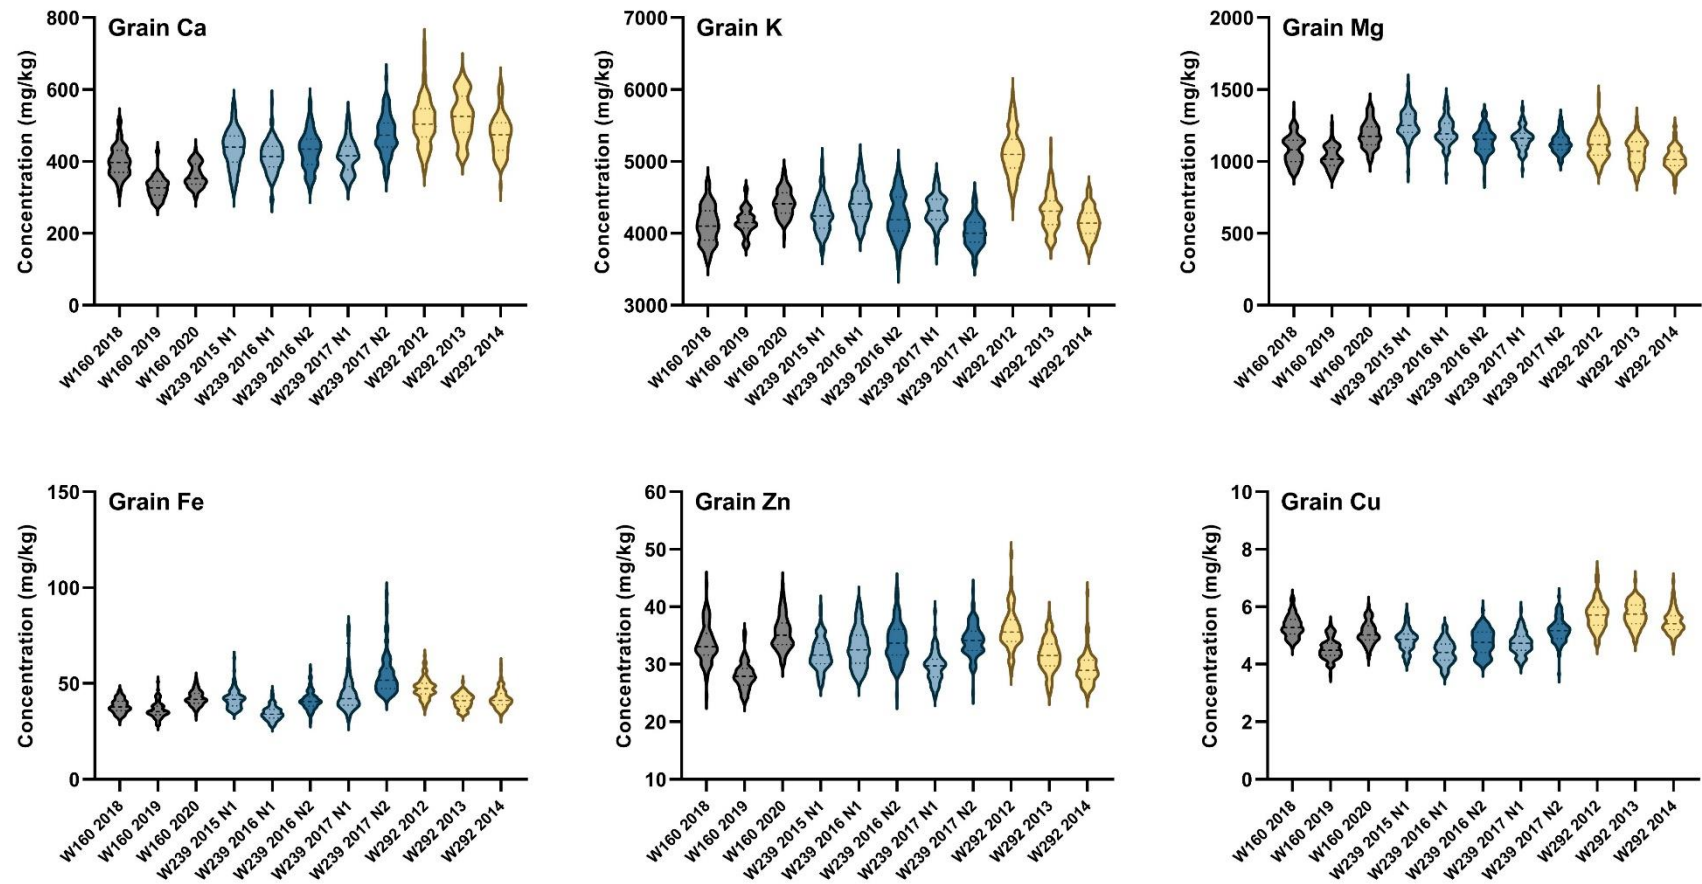

**Supplementary Fig. 2: Violin plots of grain mineral concentration in biparental populations across different environments** - This figure illustrates the distribution of grain mineral concentration (Ca, K, Mg, Fe, Zn, and Cu) in three biparental populations (Par x W160, Par x W239, Par x W292) across different environments (year, N treatment). Each population comprised 94 F4 recombinant inbred lines. Three biological replicates were included in each trial (n=3) with 1 m x 1 m plot as experimental unit. ANOVA results for each population and year can be found in Supplementary Data 3. Plots were created in GraphPad Prism v9.3.1.

**Supplementary Table 1:** Landrace parents of the three populations, selected from the A.E Watkins bread wheat landrace collection.

| <b>GRU Code</b> | <b>Watkins Code</b> | <b>Abbreviation</b> | <b>Country Code</b> | <b>Country of origin</b> | <b>Growth Habit</b> | <b>Locality</b>     | <b>Latitude</b> | <b>Longitude</b> | <b>Ancestral Group</b> <sup>21, 63</sup> |
|-----------------|---------------------|---------------------|---------------------|--------------------------|---------------------|---------------------|-----------------|------------------|------------------------------------------|
| WATDE0021       | 1190160 - 2         | W160                | ESP                 | Spain                    | spring              | Navarre             | 42.72           | -1.67            | C7                                       |
| WATDE0032       | 1190239 - 1         | W239                | ESP                 | Spain                    | spring              | Gallegos, Salamanca | 40.85           | -6.71            | C6                                       |
| WATDE0038       | 1190292 - 1         | W292                | CYP                 | Cyprus                   | spring              | Paphos district     | 34.88           | 32.52            | C6                                       |

**Supplementary Table 2:** Information about site soil type, dates of sowing, soil mineral N and N applications rates for each year and population.

| Year | Population | Soil type                                                                           | Drilling date | Soil Mineral N (kg N/ha) | N1 - Low N fertilization (kg N/ha) | N2 - High N fertilization (kg N/ha) | 1st N application (50 kg/ha) - Both N1 and N2 | 2nd N application (100 kg/ha) - N2 only | 3rd N application (50 kg/ha) - N2 only | Harvest date  |
|------|------------|-------------------------------------------------------------------------------------|---------------|--------------------------|------------------------------------|-------------------------------------|-----------------------------------------------|-----------------------------------------|----------------------------------------|---------------|
| 2012 | Par x W292 | Very slightly flinty clay loam                                                      | 24-26/10/11   | 70                       | NA                                 | 200                                 | 14/03/2012                                    | 13/04/2012                              | 17/05/2012                             | 24/8-8/9/2012 |
| 2013 | Par x W292 | Slightly flinty, very slightly calcareous clay loam to silty clay loam (Ap horizon) | 27/2-01/03/13 | 74                       | NA                                 | 200                                 | 15/04/2013                                    | 30/04/2013                              | 21/05/2013                             | 29/8-5/9/2013 |
| 2014 | Par x W292 | Very slightly flinty silty clay loam (Ap horizon)                                   | 29-30/10/13   | 71                       | NA                                 | 200                                 | 12/03/2014                                    | 03/04/2014                              | 24/04/2014                             | 13-21/8/2014  |
| 2015 | Par x W239 | Slightly flinty, very slightly calcareous silty clay loam (ap horizon)              | 27-28/10/14   | 40                       | 50                                 | 200                                 | 16/03/2015                                    | 01/04/2015                              | 30/04/2015                             | 7-11/09/2015  |
| 2016 | Par x W239 | Slightly flinty, very slightly calcareous clay loam to silty clay loam (Ap horizon) | 16-23/10/15   | 63                       | 50                                 | 200                                 | 17/03/2016                                    | 08/04/2016                              | 27/04/2016                             | 11-18/08/2016 |
| 2017 | Par x W239 | Very slightly flinty silty clay loam (Ap horizon)                                   | 19-20/10/16   | 43                       | 50                                 | 200                                 | 09/03/2017                                    | 06/04/2017                              | 11/05/2017                             | 15-26/08/2017 |
| 2018 | Par x W160 | Slightly flinty, very slightly calcareous silty clay loam (ap horizon)              | 14/10/2017    | 101                      | NA                                 | 200                                 | 16/04/2018                                    | 23/04/2018                              | 04/05/2018                             | 2-15/08/2018  |
| 2019 | Par x W160 | Slightly flinty, very slightly calcareous clay loam to silty clay loam (Ap horizon) | 22/10/2018    | 103                      | NA                                 | 200                                 | 28/02/2019                                    | 03/04/2019                              | 15/05/2019                             | 21-24/08/2019 |
| 2020 | Par x W160 | Very slightly flinty silty clay loam (Ap horizon)                                   | 21/11/2019    | 77                       | NA                                 | 200                                 | 16/03/2020                                    | 14/05/2020                              | 09/06/2020                             | 10-11/08/2020 |
